# Supplementary material for: The attachment of Sso7d-like protein improves processivity and resistance to inhibitors of M-MuLV reverse transcriptase
Source: bioRxiv or medRxiv preprint supplement (doi:10.1101/2020.07.02.185637), 2020-07-05
Supplement: Supplementary file [file media-1.pdf]

## **Construction of M-MuLV reverse transcriptase fusions**

### ***RT***

The M-MuLV reverse transcriptase nucleotide sequence was amplified using RT-F1/RT-R1 primers (Supplementary Table) with NheI and NotI restriction sites, allowing the in-frame ligation into the pET23b vector (Novagen, USA). PCR was carried out using as template M-MuLV cDNA. The resultant 1.7-kbp DNA fragment and pET23b vector were digested with NdeI and NotI (SibEnzyme, Russia), ligated, and transformed into *E. coli* XL1-Blue cells according to the standard protocols (26). The fidelity of the resulting recombinant plasmid named pET-RT was confirmed by sequence analysis using primers pET-F and pET-R (Supplementary Table).

### ***RT mut***

The plasmid pUC-RT contained partial coding sequence M-MuLV reverse transcriptase with mutations D200N, T330P, L139P was constructed by Shanghai RealGene Bio-tech, Inc (China). Plasmid pUC-RT was digested with KpnI/Sall, and DNA fragment coding mutated M-MuLV RT was eluted from agarose gel, ligated with pET-RT (KpnI/Sall), and transformed into *E. coli* XL1-Blue cells according to the standard protocols. The resulting plasmid was named pET-RT-mut.

### ***DBD-RT fusion***

Pab-DBD and partial M-MuLV-RT nucleotide sequences were amplified using DBD-F1/DBD-R1 and RT-F2/RT-R2 primers (Supplementary Table), respectively. PCR was carried out using previously constructed pET-DBD (27), containing the nucleotide sequence of the DBD of ATP-dependent DNA ligase from *Pyrococcus abyssi*, and pET-RT. Resultant PCR fragments were digested with BamHI, followed by ligation according to the standard protocols. The fusion DNA fragment was eluted from agarose gel, digested with NdeI/KpnI, and ligated with pET-RT (NdeI/KpnI). The resultant plasmid was named pET-DBD-RT.

### ***RT-DBD fusion***

The Pab-DBD and partial M-MuLV-RT nucleotide sequences were amplified using DBD-F2/DBD-R2 and RT-F3/RT-R3 primers (Supplementary Table), respectively. PCR was carried out using previously constructed pET-DBD, and pET-Gss. Resultant PCR fragments were fused via PCR with RT-F3/DBD-R2 primers. The fusion DNA fragment was eluted from agarose gel, digested with Sall/NotI, and ligated with pET-RT (Sall/NotI). The resultant plasmid was named pET-RT-DBD.

### ***Sto-RT fusion***

The Sto7d and partial M-MuLV-RT nucleotide sequences were amplified using Sto-F1/Sto-R1 and RT-F2/RT-R2 primers (Supplementary Table), and the resulting DNA fragments were fused via PCR with Sto-F1/RT-R2 primers. PCR was carried out using previously constructed pET-Sto-Gss (24), containing the mutated nucleotide sequence of the Sto7d from *Sulfolobus tokodaii*, and pET-RT. Resultant PCR fragments were fused

via PCR with Sto-F1/RT-R2 primers. The fusion DNA fragment was eluted from agarose gel, digested with NheI/KpnI, and ligated with pET-RT vector (NheI/Sall). The resultant plasmid was named pET-Sto-RT.

### ***RT-Sto fusion***

The Sto7d and partial M-MuLV-RT nucleotide sequences were amplified using Sto-F2/Sto-R2 and RT-F3/RT-R4 primers (Supplementary Table). PCR was carried out using previously constructed pET-Sto-Gss, and pET-RT. Resultant PCR fragments were fused via PCR with RT-F3/Sto-R2 primers. The fusion DNA fragment was eluted from agarose gel, digested with Sall/NotI, and ligated with pET-RT vector (Sall/NotI). The resultant plasmid was named pET-RT-Sto.

### ***RT-Sto mut fusion***

The Sto7d and partial M-MuLV-RT nucleotide sequences were amplified using Sto-F2/Sto-R2 and RT-F3/RT-R4 primers (Supplementary Table). PCR was carried out using previously constructed pET-Sto-Gss, and pET-RT mut. Resultant PCR fragments were fused via PCR with RT-F3/Sto-R2 primers. The fusion DNA fragment was eluted from agarose gel, digested with Sall/NotI, and ligated with pET-RT vector (Sall/NotI). The resultant plasmid was named pET-RT-Sto-mut.

Supplementary table. Primers for cloning of the chimeric RTs.

| <b>Name</b> | <b>5'-sequence-3'</b>                                           | <b>Restriction site</b> |
|-------------|-----------------------------------------------------------------|-------------------------|
| RT-F1       | TATGGCTAGCCTAAATATAGAAGATGAGCATCGGC                             | NheI                    |
| RT-R1       | GAGTGCGGCCGCATCAAGGCAGTTGTGTTGC                                 | NotI                    |
| DBD-F1      | TCATGCATATGAGGTACATAGAGCTGGCCCA                                 | NdeI                    |
| DBD-R1      | ATTCGGATCCCTTTATTGGCTTACCAATCTGAATT                             | BamHI                   |
| RT-F2       | ATTCGGATCCctaaatatagaagatgagcatcggc                             | BamHI                   |
| RT-R2       | GATGATGGTACCAGTATTCCTGTCC                                       | KpnI                    |
| DBD-F2      | ATTCAGATTGGTAAGCCAATAAAGAGGTACATAGAGCTGGCCCA                    |                         |
| DBD-R2      | GATGATGCGGCCGCATTAGCTAATCCATCATTACCCTCA                         | NotI                    |
| RT-F3       | CTCTTTGTCGACGAGAAGCA                                            | Sall                    |
| RT-R3       | CTTTATTGGCTTACCAATCTGAATATCAAGGCAGTTGTGTTGC                     |                         |
| Sto-F1      | GTCTCGCTAGCATGGTAACAGTAAAGTTCAAGTATAA                           | NheI                    |
| Sto-R1      | GCCGATGCTCATCTTCTATATTTAGACCGCCACCGCCTTTCTTTCCAGATTTTTCTAACATTT |                         |
| Sto-F2      | GGTACCGGCGGTGGCGGTGTAACAGTAAAGTTCAAGTATAA                       |                         |
| Sto-R2      | GATGATGCGGCCGCTTTTTCTAACATTTGTAGTAATTCTT                        | NotI                    |
| RT-R4       | ACCGCCACCGCGGTACCATCAAGGCAGTTGTGTTGC                            |                         |
| pET-F       | CCTATAGTGAGTCGTATTAATTC                                         |                         |
| pET-R       | CAACTCAGCTTCCTTTCGG                                             |                         |
